# Supplementary material
Source: PubMed Central journal article supplement (PMC2841886)
Supplement: 0910421107_pnas.0910421107_SI.pdf [file 0910421107_pnas.0910421107_SI.pdf]

# Supporting Information

Isom et al. 10.1073/pnas.0910421107

## SI Text

**Fabricated Synthetic Gene Sequences (ORFs). *SN wild-type.*** CGGCGTAGAGGATCGAGATCTCGATCCC GCGAAATTAATACGACTCACTATAGGGGAATTGTGAGCGGATAACAATTCCCCTCTAGAAATAATTTTGTTTAACTTTAA GAAGGAGATATACCATGGCAACTTCTACTAAAAAATTA CATAAAGAACCAGCAACTTTAATAAAAAGCAATC GATGGCGATACCGTCAAACCTGATGTACAAAGGC CAGCCGATGACCTTTAGACTGCTTCTGGTTCGAT ACCCTGAAACCAAACACCCGAAAGAAAGCGGTG GAAAAATACGGTCCGGAAGCATCAGCGTTCACCAA GAAGATGGTTCGAAAACGCGAAGAAGATCGAGGTA GAATTCGACAAAGGCAACCGCACGGATAAA TACGGTCTGGTCTGGCATACTATGCGGACGGC A A A A T G G T G A A C G A A G C A C T G G T A C G T C A A G G T C T G G C A A A A G T C G C A T A C G T A C A A A C C G A A C A C C C A C G A A C A G C A T C T G C G T A A A A G C G A A G C A C A G G C G A A A A A G G A G A A G C T G A A C A T C T G G A G C G A A G A T A A C G C A G A T A G T G G C C A A G G A G G C T C G G A C T A T A A A G A C G A C G A C A A G T A A T A A G A G A T C C G G C T G C T A A C A A A G C C C G A A A G G A A G C T G A G T T G G C T G C T G C C A C C G C T G A G C A A T A A C T A G C A T A A C C C C T T G G G C C T C T A A A C G G G T C T T G A G G

***ecRBP wild-type.*** CGGCGTAGAGGATCGAGATCTCGATCCC GCGAAATTAATACGACTCACTATAGGG GAATTGTGAGCGGATAACAATTCCCCTCTAGAAA TAATTTTGTTTAACTTTAAGAAGGAGATATACCATG AAGATGGGATTGCTAGTAGTAAAGTACACTCAATTAATCCATTTTTTCGTAAGTCTTAAAGACGCGCC C A A A A G A A G C G G A T A A A C T G G G C T A C A A C C T T G T C G T G C T G G A T A G C C A G A A C A A C C C G G C C A A A G A A C T G G C G A A C G T T C A G G A T C T G A C A G T G C G T G G C A C C A A A A T T C T G C T G A T C A A C C C G A C C G A T T C T G A T G C A G T A G G C A A C C G C G G T G A A A A T G G C G A A C C A G G C G A A C A T T C C G G T G A T T A C C C T G G A T A G A C A G G C G A C C A A A G G A G A A G T G G T T T C C C A T A T T G C G A G C G A C A A C G T T C T G G G C G G C A A A A T T G C G G G C G A C T A C A T T G C C A A A A A A G C G G G T G A A G G C G C G A A A G T G A T T G A A C T G C A G G G T A T T G C C G G A A C G T C A G C A G C A C G T G A A C G T G T G A A G G T T T C C A G C A G G C A G T A G C G G C G A T A A A T T C A A C G T T C T G G C C T C T C A G C A G C T G A T T T C G A C C G C A T T A A A G G C C T G A A C G T A T G C A G A A C C T G C T G A C G G C A C A T C C A G A T G T A C A G G C C G T G T T C G C G C A G A A C G A T G A A A T G G C A T T A G G C G C A T T A C G C G C A C T G C A A A C C G C A G G T A A A T C C G A C G T G A T G G T T G T A G G C T T T G A T G G T A C C C C G A T G G T G A A A A A G C G G T T A A C G A C G C A A A C T G G C A G C A A C C A T T G C C C A A C T T C C G G A T C A G A T T G G T G C G A A A G G C G T G G A A A C C G C G G A C A A A G T G C T G A A A G G C G A A A A A G T G C A G G C G A A A T A T C C G G T G G A T C T G A A A C T G G T A G T G A A A C A G A A C G G C G G C T C T G A T T A C A A A G A C G A C G A C G A C A A A T A A A A G A G A T C C G G C T G C T A A C A A A G C C C G A A A G G A A G C T G A G T T G G C T G C T G C C A C C G C T G A G C A A T A A C T A G C A T A A C C C C T T G G G G C C T C T A A A C G G G T C T T G A G G

***ecMBP wild-type.*** CGGCGTAGAGGATCGAGATCTCGATCCC GCGAAATTAATACGACTCACTATAGGG GAATTGTGAGCGGATAACAATTCCCCTCTAGAAA

TAATTTTGTTTAACTTTAAGAAGGAGATATACCATGAAAATCGAAGAAGGCAAACCTGGTTATATGGATTAATGGTGATAAAGGTTATAACGGTCTGGCGGAAGTGGGCAAAAATTCGAGAAAAGACACCCGGCATCAAAGTGACCGTTGAACATCCGGACAAAACCTGGAGGAGAAATCCCACAAGTTGCAGCAACAGGCGACGGTCTGATATCATATTCTGGGCGCATGATCGTTTTGGCGGATACGCACAATCAGGCTTACTGGCCGAAATTACCCCGATAAAGCGTTCCAAAGCAAACCTGTACCCGTTTACCTGGGACGCTGTTTCGTATAACGGGAAACTGATCGCCTACCCAATTGCAGTCGAAGCAGTGTCCCTGATCTACAACAAGATCTGCTGCCGAATCCGCCGAAAACATGGGAAGAAATCCCGGCGCTGGATAAAGAACTGAAAGCGAAAGGCAAAGCGCACTGATGTTCAACCTTCAGGAACCGTACTTCACTGGCCACTTATTGCAGCAGACGGCGTTATGCCTTCAATACGAGAACGGCAAGTACGACATCAAAGACCTCGGAGTGGATAACGCAGGTGCAAAAAGCAGGTCTGACCTTCTGGTTCGACCTCATCAAAAACAAGCACATGAACGCCGATACCGATTATAGCATCGCGAAGCAGCGTTTAAACAAGGC GAAACCGCGATGACCATTACGGACCATGGGCCTGGAGCAACATTGACACCTCAAAGTGAACCTACGGCGTAACCGTACTGCCAACCTTTAAAGGCCAGCCGACAAACCATTCTGAGGCGTACTGTGACGAGGTATTAACGCAGCAAGCCCGAACAAGA AACTGGCGAAGGAATTCCTGGAAAACCTGCTGACCGATG A A G G T C T G G A A G C C G T G A A C A A A G A T A A A C C G C T G G G C G C A G T T G C A C T G A A A A G C T A C G A A G A A G A A C T G G C G A A A G A A G A A C C C G T A T T G C A G C A A C A T G C G A A A G C G C A G A A A G C G A A A T C A T G C C G A A C A T T C C T C A G A T G A G C G C T T T C T G G T A T G C A G T T C G C A C C G C G T A T T A A C G C A G C A T C T G G T C G T C A A A C C G T A G A C G A A G C G C T G A A A G A T G C A C A G A C G C G C A T C A C C A A A G G C G C A G C G A T T A C A A A G A T G A C G A T G A C A A G T A A T G A G A G A T C C G G C T G C T A A C A A A G C C C G A A A G G A A G C T G A G T T G G C T G C T G C C A C C G C T G A G C A A T A A C T A G C A T A A C C C C T T G G G G C C T C T A A A C G G G T C T T G A G G

**Derivation of  $\Delta G_{\text{bind}}$  for Proteins with Single and Multiple Ligand-Binding Sites.** For a macromolecule with a single binding site, the relative concentrations of unliganded and liganded species is described by the binding polynomial

$$P = \left(1 + \frac{[L]}{K_D}\right). \quad [\text{S1}]$$

The expression for a single-site binding isotherm is derived from the differentiation of  $\ln(P)$  with respect to  $\ln(L)$  using the chain-rule

$$\bar{X} = \frac{d \ln P}{d \ln L} = \frac{d \ln P}{dP} \cdot \frac{dP}{dL} \cdot \frac{dL}{d \ln L} = \frac{K_A [L]}{1 + K_A [L]} = \frac{\frac{[L]}{K_D}}{1 + \frac{[L]}{K_D}}, \quad [\text{S2}]$$

where  $\bar{X}$  is the number of moles of ligand bound per mole of macromolecule and  $K_A$  and  $K_D$  are the relevant equilibrium constants for the law of mass action

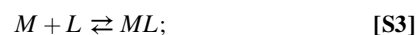

$$K_A = \frac{[ML]}{[M][L]}; \quad [\text{S4}]$$

$$K_A = \frac{1}{K_D}. \quad [\text{S5}]$$

$\bar{X}$  expressed in differential form provides the conceptual link between a ligand-binding isotherm and the free energy of ligand binding ( $\Delta G_{\text{bind}}$ ); the area underneath a plot of  $\bar{X}$  versus  $\ln(L)$  is proportional to the free energy of binding.  $\Delta G_{\text{bind}}$  is obtained by integrating the area under the binding isotherm (i.e. by integrating Eq. S2) and multiplying by the proportionality constant  $RT$

$$\Delta G_{\text{bind}} = RT \int \bar{X} d \ln L = RT \int d \ln P = RT \ln P + \Delta G_{\text{ref}}, \quad [\text{S6}]$$

where  $\Delta G_{\text{ref}}$  is the reference free energy of the macromolecule in the absence of ligand. In the specific case of a single binding site, Eq. S6 is expressed as

$$\Delta G_{\text{bind}} = RT \ln P = RT \ln \left( 1 + \frac{[L]}{K_D} \right) + \Delta G_{\text{ref}}. \quad [\text{S7}]$$

In cases where a macromolecule binds more than one ligand, the expression for  $\Delta G_{\text{bind}}$  is more complex. Consider for example the binding of  $\text{Ca}^{2+}$  and pdTP (a nucleotide inhibitor) to the enzyme *Staphylococcal* nuclease (SN). Reaction schemes S8 thru S13 describe the formation of the relevant binary and ternary complexes of an enzyme (E) combined with ligands A ( $\text{Ca}^{2+}$ ) and B (pdTP).

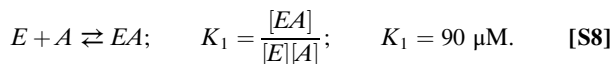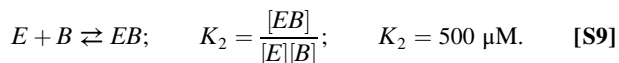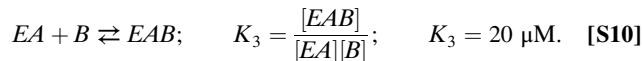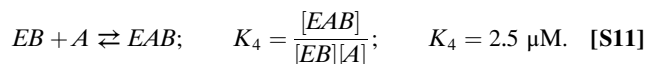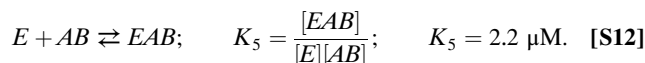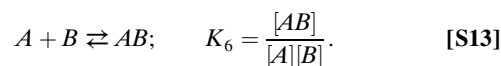

The binding of  $\text{Ca}^{2+}$  and pdTP to SN is fully described by

$$P = 1 + \frac{[A]}{K_1} + \frac{[B]}{K_2} + \frac{[A][B]}{K_1 K_3} + \frac{[B][A]}{K_2 K_4} + \frac{[AB]}{K_5}, \quad [\text{S14}]$$

and  $\Delta G_{\text{bind}}$  is described by

$$\Delta G_{\text{bind}} = RT \ln \left( 1 + \frac{[A]}{K_1} + \frac{[B]}{K_2} + \frac{[A][B]}{K_1 K_3} + \frac{[B][A]}{K_2 K_4} + \frac{[AB]}{K_5} \right) + \Delta G_{\text{ref}}. \quad [\text{S15}]$$

It has been shown that  $\text{Ca}^{2+}$  and pdTP bind synergistically to SN. Consequently, the dissociation constant  $K_5$  can be determined independent of the dissociation constants  $K_1$ ,  $K_2$ ,  $K_3$ , and  $K_4$  by measuring the ligand binding energetics of SN at concentrations of  $[AB]$  below  $K_1$ ,  $K_2$ , and  $K_3$  (i.e., 3–24  $\mu\text{M}$ ). This approach simplifies Eq. S15 considerably,

$$\Delta G_{\text{bind}} = RT \ln \left( 1 + \frac{[AB]}{K_5} \right). \quad [\text{S16}]$$

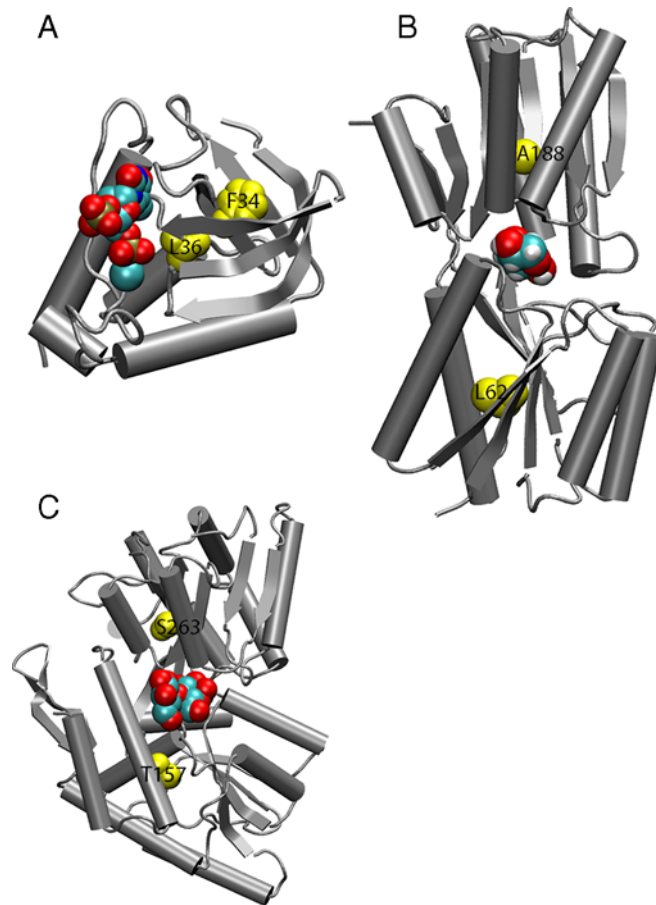

**Fig. S1.** Cysteine substitution sites in the hydrophobic core of *Staphylococcal* nuclease (A; pdb code 1SNC), *E. coli* ribose-binding protein (B; pdb code 2DR1), and *E. coli* maltose-binding protein (C; pdb code 1ANF).

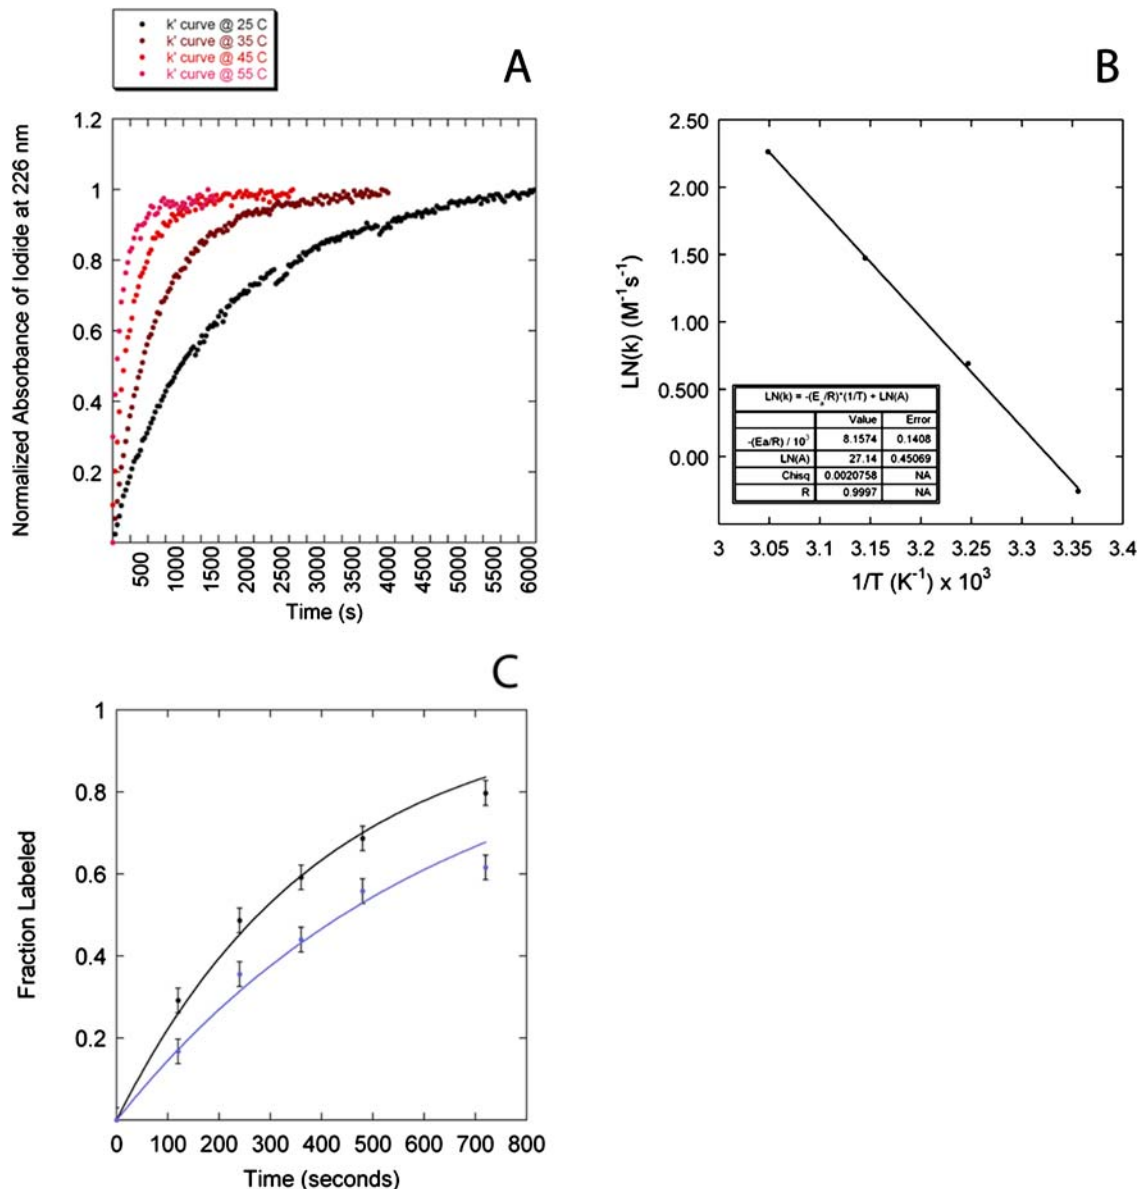

**Fig. S2.** Determination of  $k_{int}$  in model compounds and unfolded SN. (A) Progress curves for the reaction of 80  $\mu$ M IAM-biotin with 800  $\mu$ M reduced L-glutathione (GSH) at different temperatures in 25 mM MOPS, 100 mM KCl, and pH 7.6. Pseudo-first-order rate constants ( $k_{int}$ ) derived from these data:  $6.2 \times 10^{-4}$  (25 °C),  $1.6 \times 10^{-4}$  (35 °C),  $3.5 \times 10^{-3}$  (45 °C), and  $7.7 \times 10^{-3}$  (55 °C) s<sup>-1</sup>; second-order rate constants (i.e.  $k = k_{int}/[\text{GSH}]$ ) of  $7.8 \times 10^{-1}$ , 2.0, 4.4, and  $9.6 \text{ M}^{-1} \text{ s}^{-1}$ , respectively. (B) Arrhenius plot of the second-order rate constants for the bimolecular reaction of IAM-biotin and GSH. (C) Representative QCR curves at 50 °C for unfolded SN variants L36C (purple;  $k_{int} = 3 \times 10^{-3} \text{ s}^{-1}$ ) and F34C (black;  $k_{int} = 2 \times 10^{-3} \text{ s}^{-1}$ ) at 438  $\mu$ M IAM-biotin,  $\sim 0.1 \mu$ M protein, 25 mM MOPS, 100 mM KCl, and pH 7.6.

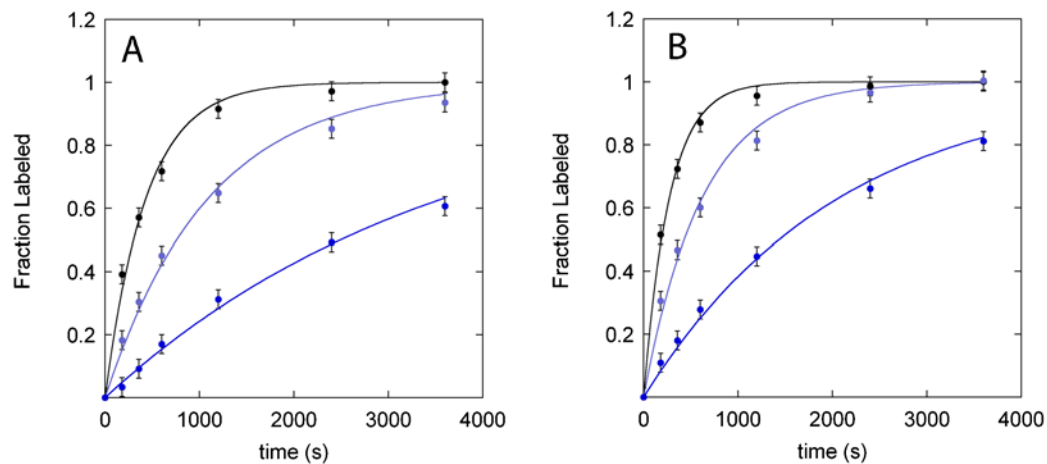

**Fig. S3.** An illustrative test of EX2 conditions for SN variants F34C and L36C at 38.3 °C. The change in observed rate constant for labeling of these protected cysteines is proportional to the change in concentration of IAM-biotin (black: 3 mM; lighter blue: 1.1 mM; darker blue: 0.3 mM).  $k_{\text{label}}$  at 3, 1.1, and 0.3 mM IAM-biotin for Cys-34:  $2.3 \times 10^{-3} \text{ s}^{-1}$ ,  $9.2 \times 10^{-4} \text{ s}^{-1}$ , and  $2.8 \times 10^{-4} \text{ s}^{-1}$ , respectively; for Cys-36:  $3.0 \times 10^{-3} \text{ s}^{-1}$ ,  $1.0 \times 10^{-3} \text{ s}^{-1}$ , and  $3.5 \times 10^{-4} \text{ s}^{-1}$ , respectively.

**Table S1.** Temperature dependence of  $\Delta G_U$  for variants of SN and ecRBP

| Variant     | $T$ °C | [IAM] [M] | $k_{\text{int}} \text{ s}^{-1}$ | $k_{\text{ex}} \text{ s}^{-1}$ | $\Delta G \text{ kcal mol}^{-1}$ |
|-------------|--------|-----------|---------------------------------|--------------------------------|----------------------------------|
| SN.F34C     | 26.3   | 3.16E-03  | 2.82E-03                        | 6.10E-05                       | 2.3                              |
| SN.F34C     | 29.3   | 3.16E-03  | 3.69E-03                        | 1.10E-04                       | 2.1                              |
| SN.F34C     | 32.3   | 1.00E-03  | 1.53E-03                        | 8.00E-05                       | 1.8                              |
| SN.F34C     | 35.3   | 1.00E-03  | 1.98E-03                        | 2.60E-04                       | 1.2                              |
| SN.F34C     | 38.3   | 1.00E-03  | 2.55E-03                        | 7.20E-04                       | 0.6                              |
| SN.F34C     | 40.3   | 1.00E-03  | 3.02E-03                        | 1.30E-03                       | 0.2                              |
| SN.L36C     | 23.3   | 3.16E-03  | 2.14E-03                        | 3.10E-05                       | 2.5                              |
| SN.L36C     | 26.3   | 3.16E-03  | 2.82E-03                        | 7.20E-05                       | 2.2                              |
| SN.L36C     | 29.3   | 3.16E-03  | 3.70E-03                        | 1.50E-04                       | 1.9                              |
| SN.L36C     | 32.3   | 1.00E-03  | 1.53E-03                        | 1.20E-04                       | 1.5                              |
| SN.L36C     | 35.3   | 1.00E-03  | 1.98E-03                        | 3.60E-04                       | 0.9                              |
| SN.L36C     | 38.3   | 1.00E-03  | 2.55E-03                        | 9.20E-04                       | 0.4                              |
| ecRBP.L62C  | 44.5   | 1.00E-03  | 4.26E-03                        | 2.00E-04                       | 1.9                              |
| ecRBP.L62C  | 45.2   | 1.00E-03  | 4.50E-03                        | 2.60E-04                       | 1.8                              |
| ecRBP.L62C  | 47.1   | 1.00E-03  | 5.25E-03                        | 5.20E-04                       | 1.4                              |
| ecRBP.L62C  | 48.9   | 1.00E-03  | 6.05E-03                        | 9.30E-04                       | 1.1                              |
| ecRBP.L62C  | 51.7   | 1.00E-03  | 7.53E-03                        | 1.90E-03                       | EX1, 0.7                         |
| ecRBP.L62C  | 54.6   | 1.00E-03  | 9.19E-03                        | 2.60E-03                       | EX1, 0.6                         |
| ecRBP.A188C | 45.2   | 1.00E-03  | 4.50E-03                        | 1.10E-04                       | 2.3                              |
| ecRBP.A188C | 47.1   | 1.00E-03  | 5.25E-03                        | 1.80E-04                       | 2.1                              |
| ecRBP.A188C | 48.9   | 1.00E-03  | 6.05E-03                        | 5.10E-04                       | 1.5                              |
| ecRBP.A188C | 51.7   | 1.00E-03  | 7.53E-03                        | 1.50E-03                       | 0.9                              |
| ecRBP.A188C | 54.6   | 1.00E-03  | 9.19E-03                        | 3.70E-03                       | 0.3                              |

**Table S2. Ligand dependence of  $\Delta G_{ij}$  for variants of SN, ecRBP, and ecMBP**

| Variant     | [Ligand] $\mu\text{M}$ | $T$ $^{\circ}\text{C}$ | [IAM] [M] | $k_{\text{int}}$ $\text{s}^{-1}$ | $k_{\text{ex}}$ $\text{s}^{-1}$ | $\Delta G$ $\text{kcal mol}^{-1}$ | $\Delta\Delta G$ $\text{kcal mol}^{-1}$ |
|-------------|------------------------|------------------------|-----------|----------------------------------|---------------------------------|-----------------------------------|-----------------------------------------|
| SN.F34C     | 0                      | 35.3                   | 1.00E-03  | 1.98E-03                         | 2.62E-04                        | 1.2                               | 0                                       |
| SN.F34C     | 3                      | 35.3                   | 1.00E-03  | 1.98E-03                         | 1.82E-04                        | 1.4                               | 0.3                                     |
| SN.F34C     | 6                      | 35.3                   | 1.00E-03  | 1.98E-03                         | 1.35E-04                        | 1.6                               | 0.5                                     |
| SN.F34C     | 12                     | 35.3                   | 1.00E-03  | 1.98E-03                         | 8.60E-05                        | 1.9                               | 0.7                                     |
| SN.F34C     | 24                     | 35.3                   | 1.00E-03  | 1.98E-03                         | 4.60E-05                        | 2.3                               | 1.1                                     |
| SN.L36C     | 0                      | 35.3                   | 1.00E-03  | 1.98E-03                         | 3.60E-04                        | 0.9                               | 0                                       |
| SN.L36C     | 3                      | 35.3                   | 1.00E-03  | 1.98E-03                         | 1.80E-04                        | 1.4                               | 0.5                                     |
| SN.L36C     | 6                      | 35.3                   | 1.00E-03  | 1.98E-03                         | 1.30E-04                        | 1.6                               | 0.7                                     |
| SN.L36C     | 12                     | 35.3                   | 1.00E-03  | 1.98E-03                         | 6.10E-05                        | 2.1                               | 1.2                                     |
| SN.L36C     | 24                     | 35.3                   | 1.00E-03  | 1.98E-03                         | 3.40E-05                        | 2.5                               | 1.6                                     |
| ecRBP.L62C  | 0                      | 48.9                   | 1.00E-03  | 6.05E-03                         | 9.90E-04                        | 1.0                               | 0                                       |
| ecRBP.L62C  | 1.5                    | 48.9                   | 1.00E-03  | 6.05E-03                         | 5.10E-04                        | 1.5                               | 0.5                                     |
| ecRBP.L62C  | 3                      | 48.9                   | 1.00E-03  | 6.05E-03                         | 3.60E-04                        | 1.8                               | 0.7                                     |
| ecRBP.L62C  | 6                      | 48.9                   | 1.00E-03  | 6.05E-03                         | 1.90E-04                        | 2.2                               | 1.2                                     |
| ecRBP.L62C  | 12                     | 48.9                   | 1.00E-03  | 6.05E-03                         | 1.10E-04                        | 2.6                               | 1.5                                     |
| ecRBP.L62C  | 24                     | 48.9                   | 1.00E-03  | 6.05E-03                         | 9.10E-05                        | 2.7                               | 1.6                                     |
| ecRBP.A188C | 0                      | 54.6                   | 1.00E-03  | 9.40E-03                         | 2.17E-03                        | 0.8                               | 0                                       |
| ecRBP.A188C | 1.5                    | 54.6                   | 1.00E-03  | 9.40E-03                         | 1.41E-03                        | 1.1                               | 0.3                                     |
| ecRBP.A188C | 3                      | 54.6                   | 1.00E-03  | 9.40E-03                         | 9.70E-04                        | 1.4                               | 0.6                                     |
| ecRBP.A188C | 6                      | 54.6                   | 1.00E-03  | 9.40E-03                         | 7.30E-04                        | 1.6                               | 0.8                                     |
| ecRBP.A188C | 12                     | 54.6                   | 1.00E-03  | 9.40E-03                         | 3.20E-04                        | 2.2                               | 1.4                                     |
| ecRBP.A188C | 24                     | 54.6                   | 1.00E-03  | 9.40E-03                         | 1.90E-04                        | 2.5                               | 1.7                                     |
| ecMBP.T157C | 0                      | 63.3                   | 1.00E-03  | 1.79E-02                         | 5.10E-04                        | 2.4                               | 0                                       |
| ecMBP.T157C | 6                      | 63.3                   | 1.00E-03  | 1.79E-02                         | 2.50E-04                        | 2.9                               | 0.5                                     |
| ecMBP.T157C | 12                     | 63.3                   | 1.00E-03  | 1.79E-02                         | 1.80E-04                        | 3.1                               | 0.7                                     |
| ecMBP.T157C | 24                     | 63.3                   | 1.00E-03  | 1.79E-02                         | 1.30E-04                        | 3.3                               | 0.9                                     |
| ecMBP.T157C | 48                     | 63.3                   | 1.00E-03  | 1.79E-02                         | 9.10E-05                        | 3.5                               | 1.2                                     |
| ecMBP.S263C | 0                      | 63.3                   | 1.00E-03  | 1.79E-02                         | 5.30E-04                        | 2.3                               | 0                                       |
| ecMBP.S263C | 6                      | 63.3                   | 1.00E-03  | 1.79E-02                         | 3.50E-04                        | 2.6                               | 0.3                                     |
| ecMBP.S263C | 12                     | 63.3                   | 1.00E-03  | 1.79E-02                         | 2.60E-04                        | 2.8                               | 0.5                                     |
| ecMBP.S263C | 24                     | 63.3                   | 1.00E-03  | 1.79E-02                         | 1.60E-04                        | 3.2                               | 0.8                                     |
| ecMBP.S263C | 48                     | 63.3                   | 1.00E-03  | 1.79E-02                         | 1.20E-04                        | 3.4                               | 1.0                                     |
